# Supplementary material for: Bacterial Infection and Implant Loosening in Hip and Knee Arthroplasty: Evaluation of 209 Cases
Source: PubMed Central journal article supplement (PMC5457256; doi:10.3390/ma9110871), 2016-10-26
Supplement: materials-09-00871-s001.pdf [file materials-09-00871-s001.pdf]

# Supplementary Materials: Bacterial Infection and Implant Loosening in Hip and Knee Arthroplasty: Evaluation of 209 Cases

Ulrike Dapunt, Stephanie Radzuweit-Mihaljevic, Burkhard Lehner, Gertrud Maria Haensch and Volker Ewerbeck

**Table S1.** Causative agents detected in patients with prosthetic joint infection of the hip and knee.

| Causative Agents Detected    | Bacteria Species in Detail          | Number         |
|------------------------------|-------------------------------------|----------------|
| <i>S. aureus</i>             | –                                   | 43             |
| <i>S. epidermidis</i>        | –                                   | 53             |
|                              |                                     | 20 (in detail) |
| other staphylococcus species | <i>S. hominis,</i>                  | 4              |
|                              | <i>S. haemolyticus,</i>             | 3              |
|                              | <i>S. caprae,</i>                   | 1              |
|                              | <i>S. lugdunensis,</i>              | 5              |
|                              | <i>S. gallolyticus,</i>             | 1              |
|                              | <i>S. capitis</i>                   | 6              |
|                              |                                     | 16 (in detail) |
| <i>Streptococcus</i> sp.     | <i>St. agalactiae,</i>              | 1              |
|                              | <i>St. pneumoniae,</i>              | 1              |
|                              | <i>St. parasanguinis,</i>           | 1              |
|                              | <i>St. dysgalactiae,</i>            | 2              |
|                              | <i>St. oralis,</i>                  | 4              |
|                              | <i>St. anginosus,</i>               | 2              |
|                              | <i>St. canis,</i>                   | 1              |
|                              | <i>St. Group G,</i>                 | 1              |
|                              | <i>St. mitis,</i>                   | 1              |
| <i>S. pyogenes</i>           | 2                                   |                |
| <i>Enterococcus</i> species  | –                                   | 19             |
|                              |                                     | 30 (in detail) |
| others                       | <i>Enterobacter cloacae,</i>        | 3              |
|                              | <i>Parvimonas micra,</i>            | 2              |
|                              | <i>Escherichia coli,</i>            | 4              |
|                              | <i>Acinetobacter baumannii,</i>     | 2              |
|                              | <i>Bacillus</i> sp.,                | 3              |
|                              | <i>Pantoea</i> sp.,                 | 1              |
|                              | <i>Sphingobacterium multivorum,</i> | 1              |
|                              | <i>Fingoldia magna,</i>             | 1              |
|                              | <i>Phialemonium</i> sp.,            | 1              |
|                              | <i>Clostridium perfringens,</i>     | 1              |
|                              | <i>Rothiadentocariosa,</i>          | 1              |
|                              | <i>Serratia</i> sp.,                | 1              |
|                              | <i>Actinomyces oris,</i>            | 1              |
|                              | <i>Klebsiella pneumoniae,</i>       | 2              |
|                              | <i>Pseudomonas aeruginosa,</i>      | 2              |
| <i>Micrococcus lentus,</i>   | 1                                   |                |
| <i>Proteus mirabilis,</i>    | 2                                   |                |
| <i>Propionibacterium</i> sp. | 1                                   |                |
